# Supplementary material
Source: PubMed Central journal article supplement (PMC3751318)
Supplement: Supp_Fig1.pdf [file Supp_Fig1.pdf]

## Supplementary Data

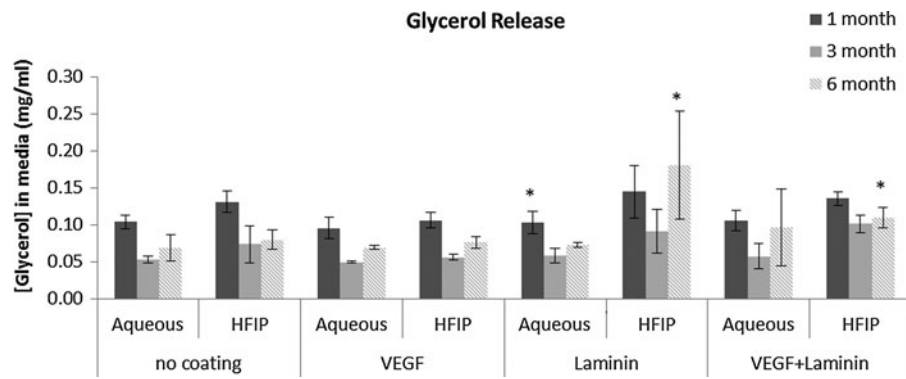

**SUPPLEMENTARY FIG. S1.** Glycerol levels were the greatest in laminin-coated solvent-based scaffolds over the 6-month study. \*Indicates significance level of  $p < 0.05$  compared to 1 month uncoated group.
