# Supplementary material
Source: PubMed Central journal article supplement (PMC3751318)
Supplement: Supp_Fig2.pdf [file Supp_Fig2.pdf]

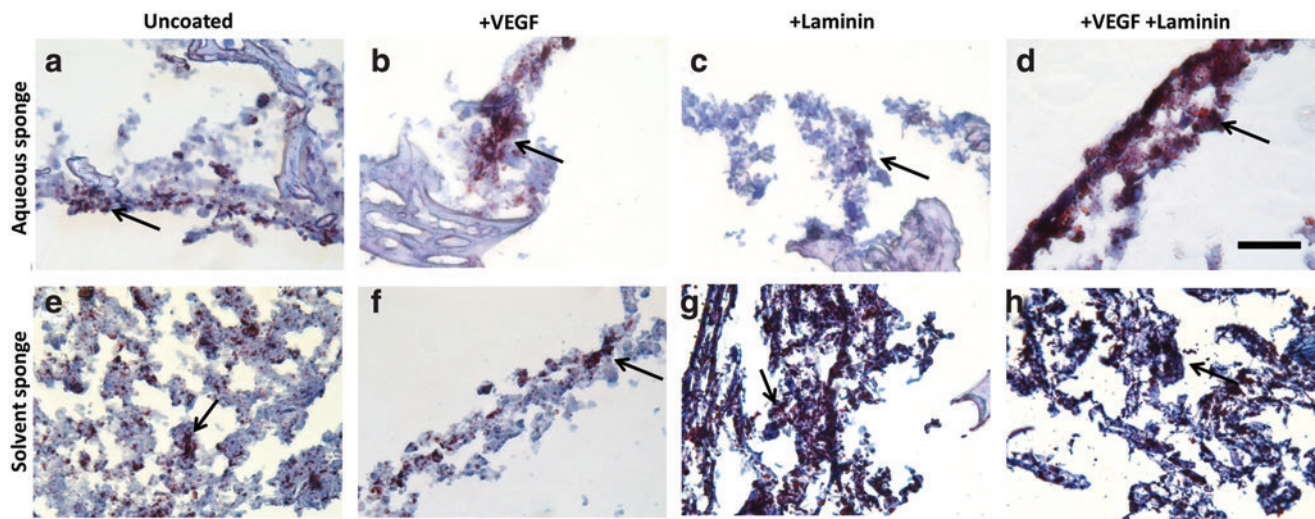

**SUPPLEMENTARY FIG. S2.** Representative histological images of Oil Red O staining for mature adipocytes after 6 months in static culture conditions. Scaffold type, aqueous (**a–d**) and solvent (**e–h**)-based scaffolds were evaluated. Scaffold coatings, uncoated (**a, e**), vascular endothelial growth factor (VEGF) (**b, f**), laminin (**c, g**), and VEGF+laminin (**d, h**) were also compared. Black arrows point to regions of Oil Red O positive staining. Scale bar: 50  $\mu$ m.
