# Supplementary material
Source: PubMed Central journal article supplement (PMC3751318)
Supplement: Supp_Fig4.pdf [file Supp_Fig4.pdf]

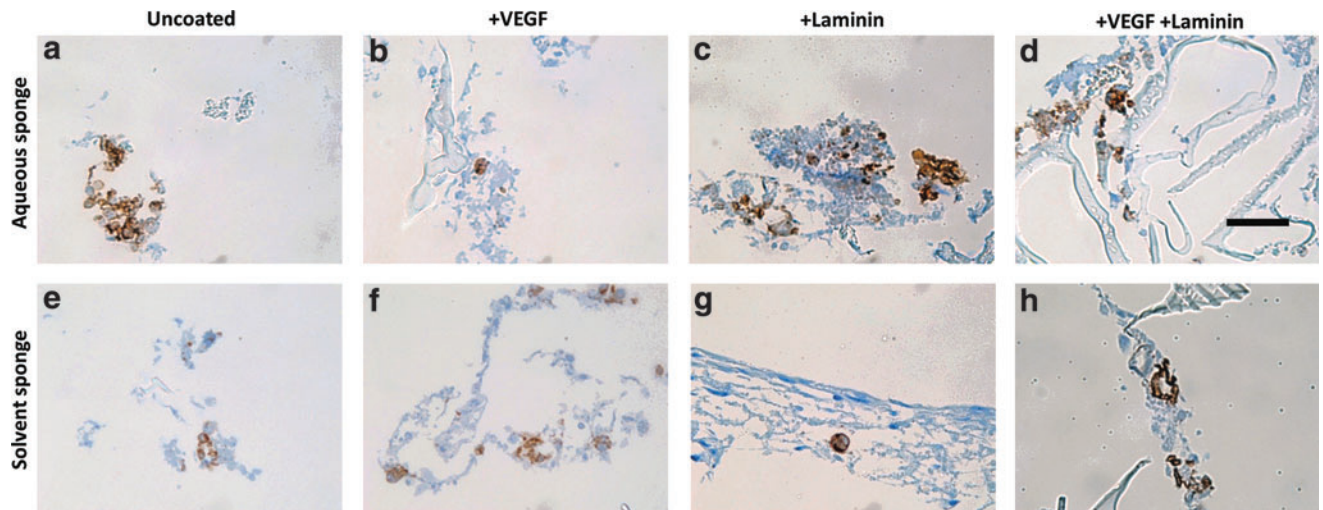

**SUPPLEMENTARY FIG. S4.** Representative histological images of CD31 positive staining (brown) for endothelial cells after 6 months in static culture conditions. Scaffold type, aqueous (a–d) and solvent (e–h)-based scaffolds were evaluated. Scaffold coatings, uncoated (a, e), VEGF (b, f), laminin (c, g), and VEGF + laminin (d, h) were also compared. Scale bar: 50  $\mu$ m.
